# Supplementary material for: Dos obispos de Segovia en el siglo X: Frunimio de Wamba (927) e Ilderedo de Simancas (960)
Source: Royal Society of Chemistry journal article supplement (doi:10.1039/c9ra10158f), 2002-01-01
Supplement: c9ra10158f1.pdf [file c9ra10158f1.pdf]

## 1 Supplementary material

2 The following are the Supplementary data to this article:

### 3 **Supplementary data 1.a.** Changes of rat's body weight in normoglycemic animals

| <b>1. Experimental group</b>            | <b>Body weight before treatment (g) (BW before (g)±SD)</b> | <b>Body weight after treatment (g) (BW after (g)±SD)</b> | <b>The difference in body weight (g) (BW difference(g)±SD)</b> |
|-----------------------------------------|------------------------------------------------------------|----------------------------------------------------------|----------------------------------------------------------------|
| Control                                 | 225±5 <sup>b</sup>                                         | 242±4 <sup>b</sup>                                       | 18±2 <sup>a</sup>                                              |
| <i>G. pfeifferi</i> , EtOH              | 219±10 <sup>b</sup>                                        | 234±12 <sup>b</sup>                                      | 15±6 <sup>a</sup>                                              |
| <i>G. pfeifferi</i> , H <sub>2</sub> O  | 322±13 <sup>a</sup>                                        | 323±21 <sup>a</sup>                                      | 1.2±0.1 <sup>b</sup>                                           |
| <i>G. resinaceum</i> , EtOH             | 235±21 <sup>b</sup>                                        | 248±23 <sup>b</sup>                                      | 13±2 <sup>a</sup>                                              |
| <i>G. resinaceum</i> , H <sub>2</sub> O | 237±22 <sup>b</sup>                                        | 253±20 <sup>b</sup>                                      | 16±2 <sup>a</sup>                                              |

4

### 5 **Supplementary data 1.b.** Changes of rat's body weight in animals with alloxan-induced diabetes

6

| <b>2. Experimental group</b>                      | <b>Body weight before treatment (g) (BW before (g)±SD)</b> | <b>Body weight after treatment (g) (BW after (g)±SD)</b> | <b>The difference in body weight (g) (BW difference(g)±SD)</b> |
|---------------------------------------------------|------------------------------------------------------------|----------------------------------------------------------|----------------------------------------------------------------|
| Alloxan                                           | 340±26 <sup>a</sup>                                        | 327±24 <sup>a</sup>                                      | 13±6 <sup>a</sup>                                              |
| alloxan + <i>G. pfeifferi</i> , EtOH              | 273±51 <sup>b</sup>                                        | 266±45 <sup>a</sup>                                      | 7±4 <sup>a</sup>                                               |
| alloxan + <i>G. pfeifferi</i> , H <sub>2</sub> O  | 281±48 <sup>a</sup>                                        | 271±45 <sup>a</sup>                                      | 10±5 <sup>a</sup>                                              |
| alloxan + <i>G. resinaceum</i> , EtOH             | 273±28 <sup>b</sup>                                        | 260±25 <sup>b</sup>                                      | 13±2 <sup>a</sup>                                              |
| alloxan + <i>G. resinaceum</i> , H <sub>2</sub> O | 272±33 <sup>b</sup>                                        | 260±35 <sup>b</sup>                                      | 12±4 <sup>a</sup>                                              |

7 BW, body weight; SD, standard deviation

8 Data are reported as mean ± SD of triplicates

9 <sup>a, b</sup> different letters in the same column indicate significant difference between extracts (Tukey's test,

10 p<0.01)
